# Supplementary material for: Synthesis of nickel/gallium nanoalloys using a dual-source approach in 1-alkyl-3-methylimidazole ionic liquids
Source: publisher site journal article supplement (doi:10.3762/bjnano.10.171), 2019-08-21
Supplement: Additional file 1 [file 2190-4286-10-171-S1.pdf]

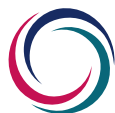

## Supporting Information

for

### **Synthesis of nickel/gallium nanoalloys using a dual-source approach in 1-alkyl-3-methylimidazole ionic liquids**

Ilka Simon, Julius Hornung, Juri Barthel, Jörg Thomas, Maik Finze, Roland A. Fischer and Christoph Janiak

*Beilstein J. Nanotechnol.* **2019**, *10*, 1754–1767. doi:10.3762/bjnano.10.171

## Additional experimental details

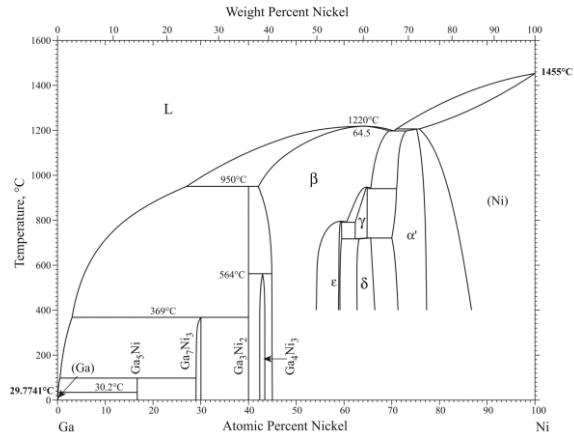

| Phase                           | Composition, at.% Ni | Pearson symbol | Space group               | Strukturbericht designation | Prototype                       |
|---------------------------------|----------------------|----------------|---------------------------|-----------------------------|---------------------------------|
| (Ga)                            | 0                    | <i>oC8</i>     | <i>Cmca</i>               | <i>A11</i>                  | Ga                              |
| Ga <sub>5</sub> Ni              | 16.7                 | ...            | ...                       | ...                         | ...                             |
| Ga <sub>7</sub> Ni <sub>3</sub> | 29-30                | <i>cI40</i>    | <i>Im3m</i>               | <i>D8<sub>f</sub></i>       | Ge <sub>7</sub> Ir <sub>3</sub> |
| Ga <sub>3</sub> Ni <sub>2</sub> | 40                   | <i>hP5</i>     | <i>P3m1</i>               | <i>D5<sub>13</sub></i>      | Al <sub>3</sub> Ni <sub>2</sub> |
| Ga <sub>4</sub> Ni <sub>3</sub> | 42.4-43.4            | <i>cI112</i>   | <i>Ia3d</i>               | ...                         | ...                             |
| β                               | 42-69.4              | <i>cP2</i>     | <i>Pm3m</i>               | <i>B2</i>                   | CsCl                            |
| ε                               | 59-59.5              | ...            | ...                       | ...                         | ...                             |
| γ                               | 62.5-65              | <i>hP4</i>     | <i>P6<sub>3</sub>/mmc</i> | <i>B8<sub>1</sub></i>       | NiAs                            |
| δ                               | 63-66.5              | <i>oC16</i>    | <i>Cmmm</i>               | ...                         | Ga <sub>3</sub> Pt <sub>5</sub> |
| α'                              | 70-77                | <i>cP4</i>     | <i>Pm3m</i>               | <i>L1<sub>2</sub></i>       | AuCu <sub>3</sub>               |
| (Ni)                            | 75.7-100             | <i>cF4</i>     | <i>Fm3m</i>               | <i>A1</i>                   | Cu                              |

**Figure S1:** Phase diagram and crystal structure data for Ni/Ga taken from literature [1].

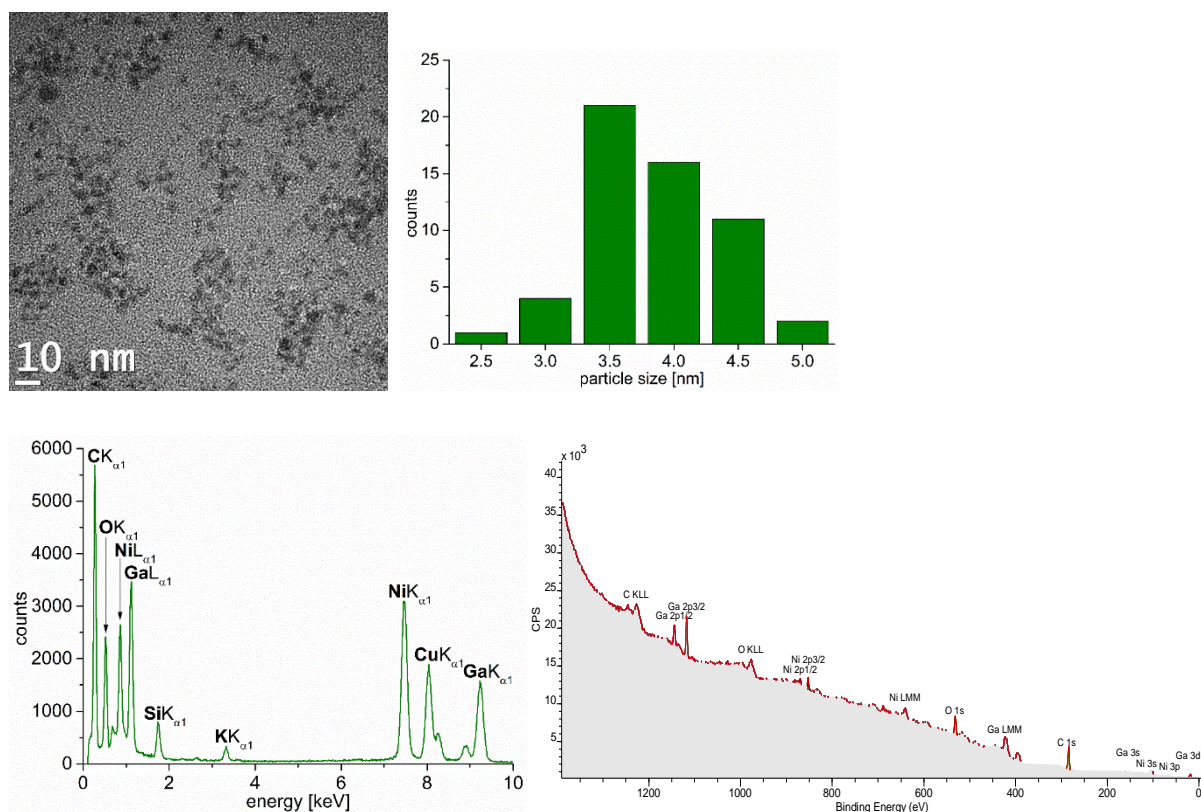

**Figure S2:** HR-TEM-Images and particle size distribution of the Ni/Ga-nanoparticles from 1 wt % dispersion of Ni(COD)<sub>2</sub> and GaCp\* in [BMIm][BF<sub>4</sub>] (top) with 24 hours dispersion time, 10 minutes microwave decomposition time. Particle size  $2.5 \pm 0.5$  nm (65 particles counted). EDX- and XP-spectra (bottom). EDX-Quantification from three different spots on the TEM-Grid showed equimolar ratio of nickel to gallium of 41:59 atom % ( $\pm 1$  atom %). No SAED-measurement was possible.

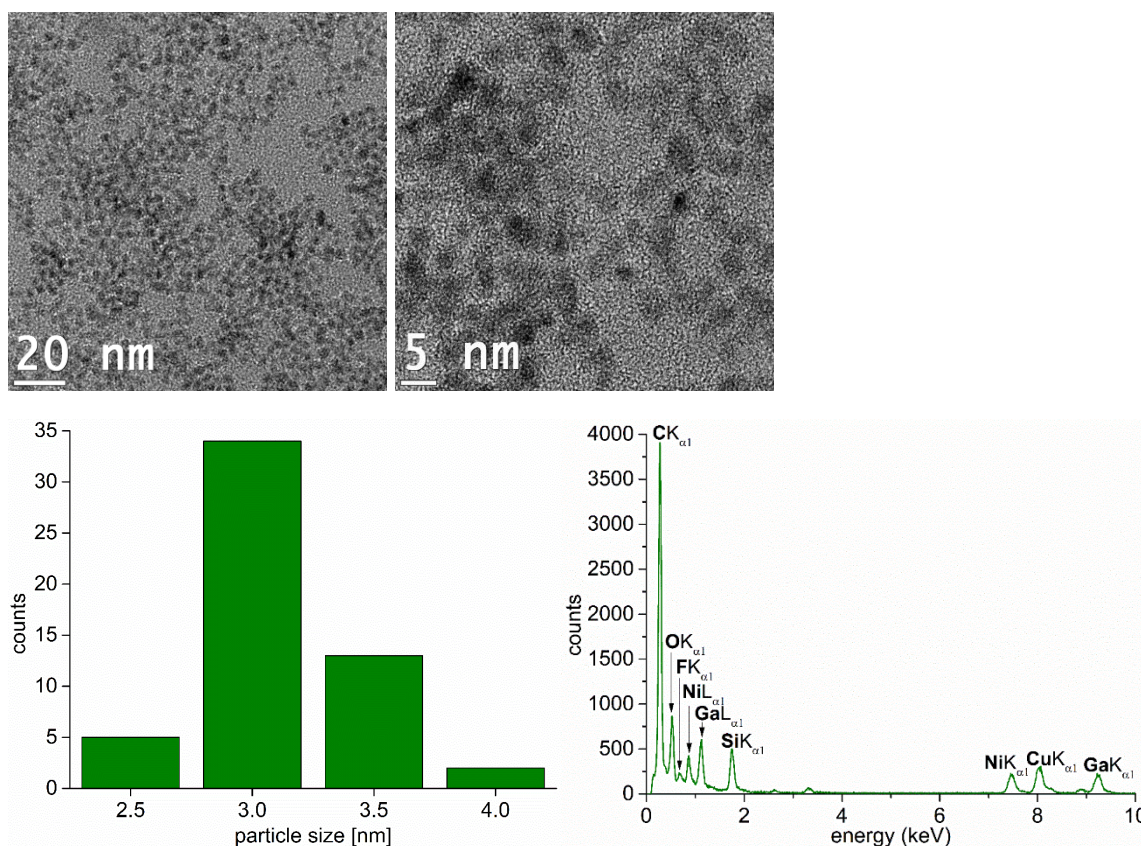

**Figure S3:** HR-TEM-Images of the Ni/Ga-nanoparticles from 0.5 wt % dispersion of  $Ni(COD)_2$  and  $GaCp^*$  in  $[BMIm][BF_4]$  (top) with 24 hours dispersion time, 20 minutes microwave decomposition. Particle size distribution  $2.5 \pm 0.5$  nm (56 particles counted) and EDX-spectra (bottom). EDX-Quantification from three different spots on the TEM-Grid showed equimolar ratio of nickel to gallium of 57:43 atom % ( $\pm 2$  atom %). No SAED-measurement was possible.

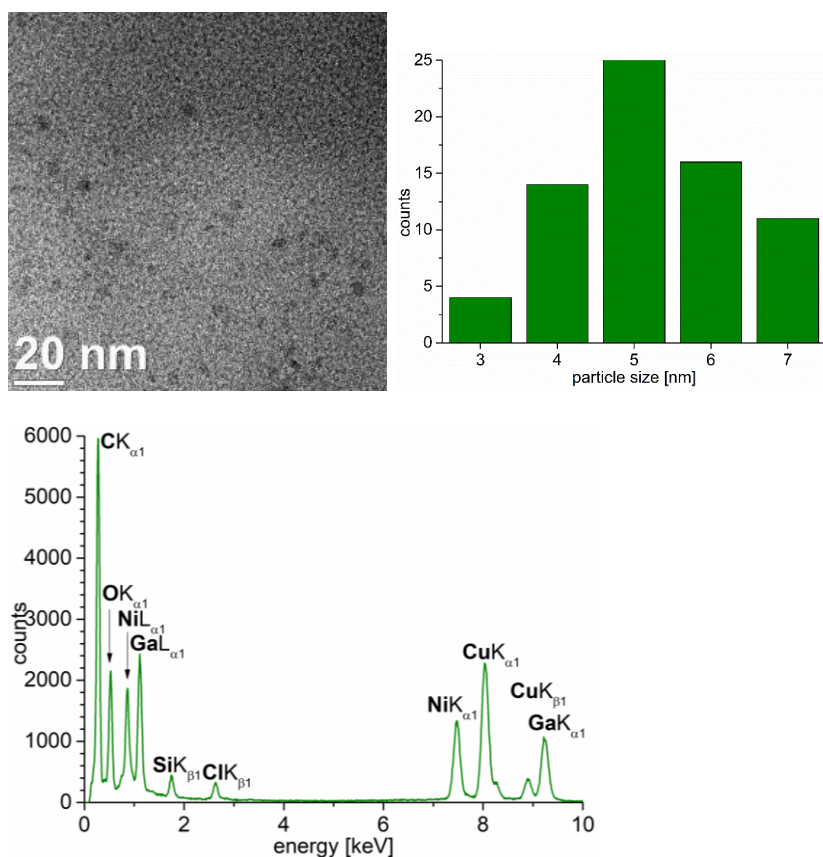

**Figure S4:** HR-TEM-Images and particle size distribution of the Ni/Ga-nanoparticles from 0.5 wt-% dispersion of  $\text{Ni}(\text{COD})_2$  and  $\text{GaCp}^*$  in propylene carbonate (PC). 24 hours dispersion time before decomposition, 20 minutes microwave decomposition. Particle size  $5 \pm 1$  nm (70 particles counted). EDX-Quantification from three different spots on the TEM-Grid showed equimolar ratio of nickel to gallium of 45:55 atom % ( $\pm 1$  atom %). No SAED-measurement possible.

**Table S1:** Comparison of d-spacing values (hkl-index) of experimental results (exp.) vs NiGa, Ga and Ga-rich phases. For literature d-spacing values the nine most intense reflections were chosen.

| exp.  | NiGa<br>[ <i>Pm</i> $\bar{3}$ <i>m</i> ] | Ga<br>[ <i>Cmce</i> ]            | Ni <sub>3</sub> Ga <sub>4</sub><br>[ <i>Ia</i> $\bar{3}$ <i>d</i> ] | Ni <sub>2</sub> Ga <sub>3</sub><br>[ <i>P</i> $\bar{3}$ <i>m</i> ] | Ni <sub>3</sub> Ga <sub>7</sub><br>[ <i>Im</i> $\bar{3}$ <i>m</i> ] | NiGa <sub>5</sub><br>[ <i>I4/mcm</i> ] |
|-------|------------------------------------------|----------------------------------|---------------------------------------------------------------------|--------------------------------------------------------------------|---------------------------------------------------------------------|----------------------------------------|
| 0.398 |                                          | 0.382<br>(020)                   | 0.466<br>(211)                                                      | 0.489<br>(001)<br>0.351<br>(100)                                   | –                                                                   | –                                      |
| 0.283 | 0.288<br>(100)                           | 0.294<br>(111)                   | 0.305<br>(321)<br>0.285<br>(400)                                    | 0.285<br>(101)                                                     | 0.267<br>(310)<br>0.244<br>(222)                                    | 0.271<br>(211)                         |
| 0.231 |                                          | 0.225<br>(200)                   | –                                                                   | –                                                                  | 0.226<br>(321)                                                      | 0.223<br>(220)<br>0.213<br>(114/213)   |
| 0.201 | 0.204<br>(110)                           | 0.199<br>(131)                   | 0.208<br>(521)<br>0.202<br>(440)                                    | 0.203<br>(110)<br>0.201<br>(102/012)                               | 0.199<br>(330/411)                                                  | 0.200<br>(310)<br>0.193<br>(204)       |
| 0.181 |                                          | 0.178<br>(221)                   | –                                                                   | –                                                                  | 0.189<br>(420)                                                      | –                                      |
| 0.164 | 0.167<br>(111)                           |                                  | 0.165<br>(444)                                                      | –                                                                  | 0.172<br>(422)                                                      | –                                      |
| 0.141 | 0.144<br>(200)                           | 0.140<br>(023)                   | 0.143<br>(800)                                                      | 0.143<br>(202)                                                     | 0.149<br>(440)<br>0.141<br>(600)                                    | –                                      |
| 0.134 | 0.129<br>(210)                           |                                  | –                                                                   | –                                                                  | –                                                                   | 0.132<br>(404)                         |
| 0.127 |                                          | 0.124<br>(331)<br>0.122<br>(152) | 0.128<br>(840)                                                      | –                                                                  | –                                                                   | 0.127<br>(334)<br>0.125<br>(217)       |
| 0.121 | 0.118<br>(211)                           | 0.119<br>(223)                   | 0.117<br>(844)                                                      | 0.117<br>(300)<br>0.117<br>(122/21 $\bar{2}$ )<br>0.115<br>(104)   | 0.115<br>(633)                                                      | –                                      |

**Table S2:** EDX-quantification results from NiGa- and Ga(Ni)-nanoparticles in [BMIm][NTf<sub>2</sub>], 1 hour and 12 hours dispersion time.

|                                                                                                                 |    |    |    |    |   |
|-----------------------------------------------------------------------------------------------------------------|----|----|----|----|---|
| mostly large Ga(Ni)- next to some small NiGa-nanoparticles in [BMIm][NTf <sub>2</sub> ], 1 hour dispersion time |    |    |    |    |   |
| spot number                                                                                                     | #1 | #2 | #3 | Ø  | σ |
| Ni (K) [%]                                                                                                      | 28 | 24 | 30 | 28 | 2 |
| Ga (K) [%]                                                                                                      | 72 | 76 | 70 | 72 | 2 |
| NiGa- and Ga(Ni)-nanoparticles in [BMIm][NTf <sub>2</sub> ], 12 hour dispersion time                            |    |    |    |    |   |
| spot number                                                                                                     | #1 | #2 | #3 | Ø  | σ |
| Ni (K) [%]                                                                                                      | 36 | 38 | 40 | 38 | 1 |
| Ga (K) [%]                                                                                                      | 64 | 62 | 60 | 62 | 1 |



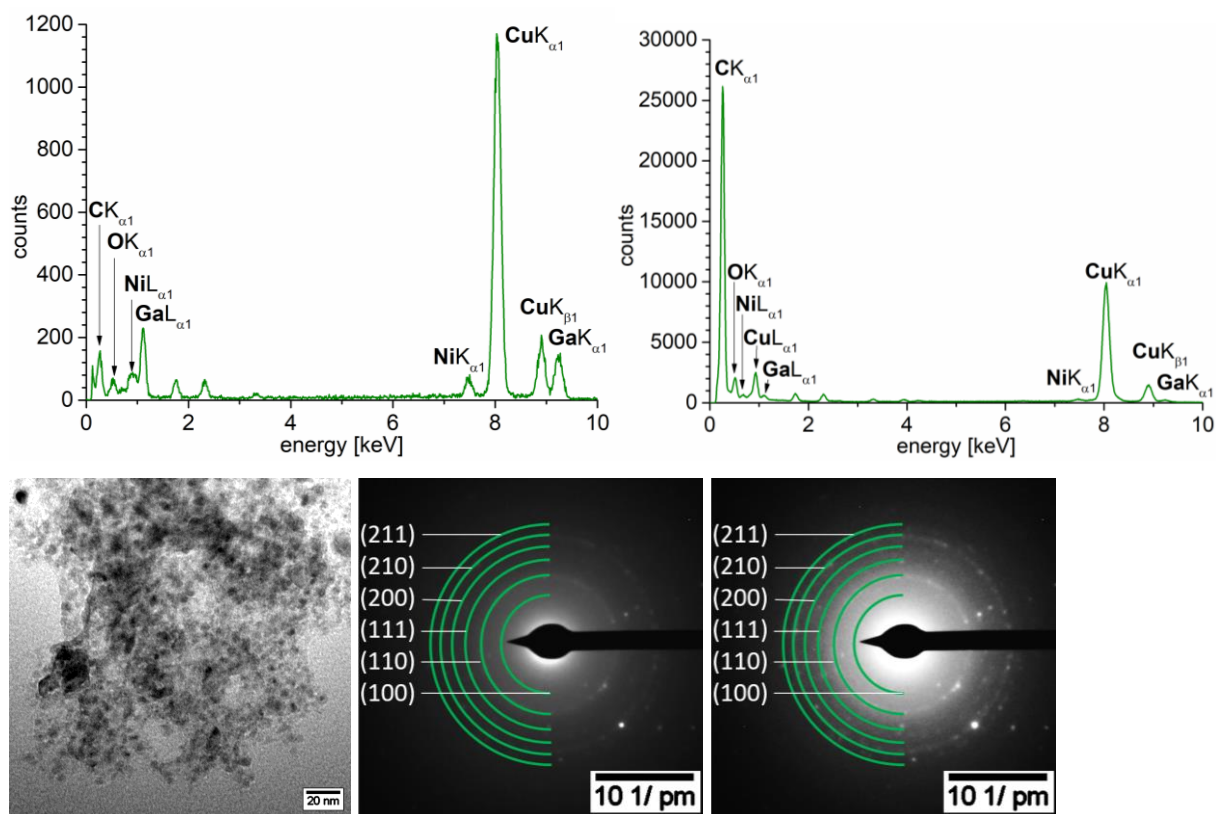

**Figure S5:** Top: EDX-spectra of mostly large Ga(Ni)-nanoparticles (left) and only small NiGa-nanoparticles (right) from a 0.5 wt % dispersion of Ni(COD)<sub>2</sub> and GaCp\* in [BMIm][NTf<sub>2</sub>] after 1 hour dispersion time prior to 30 min decomposition. Bottom: HR-TEM-image of NiGa-nanoparticles. SAED with indexed reflections for NiGa (green diffraction rings for space group  $Pm\bar{3}m$ ) with two different contrasts.



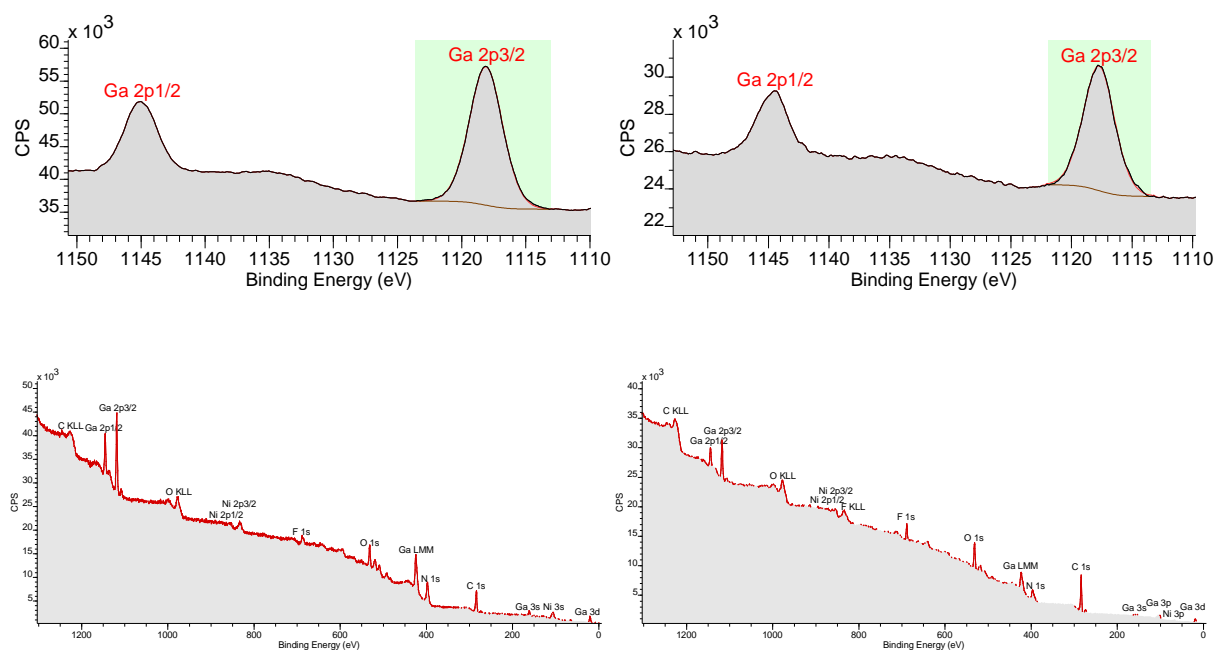

**Figure S6:** Top: HR-XPS-spectral region of the Ga 2p<sub>1/2</sub> and 2p<sub>3/2</sub>-orbital of NiGa/ Ga(Ni)-nanoparticles samples obtained by microwave-induced decomposition after 1 hour dispersion time (left) and 12 hours dispersion time (right). Bottom: full XPS-spectra of NiGa/ Ga(Ni)-nanoparticles samples obtained by microwave-induced decomposition after 1 hour dispersion time (left) and 12 hours dispersion time (right).

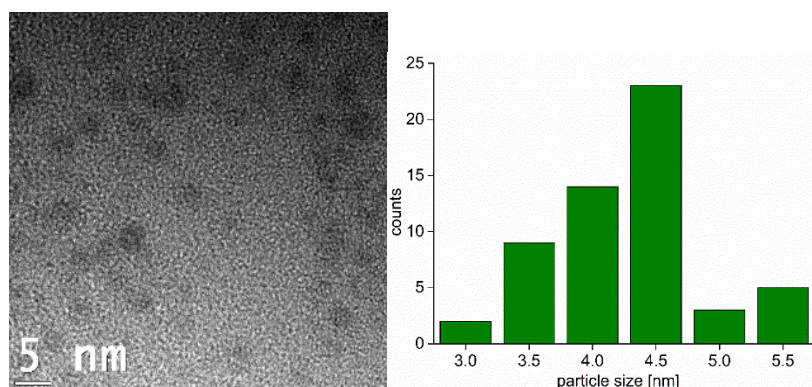

**Figure S7:** HR-TEM-Images and particle size distribution of the Ni-nanoparticles from 1 wt % dispersion of Ni(COD)<sub>2</sub> and GaCp\* in [EMIm][B(CN)<sub>4</sub>]. 30 minutes dispersion time, 30 minutes microwave decomposition. Particle size: 4 ± 1 nm (56 particles counted). EDX-Quantification from three different spots on the TEM-Grid showed only nickel. No SAED-measurement possible.

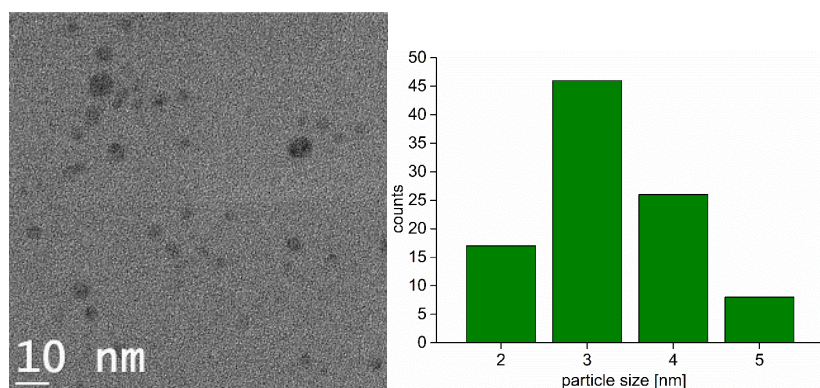

**Figure S8:** HR-TEM-Images and particle size distribution of the Ni/Ga-nanoparticles from 1 wt % dispersion of  $\text{Ni(COD)}_2$  and  $\text{GaCp}^*$  in  $[\text{EMIm}][\text{B(CN)}_4]$ . 24 hours dispersion time, 30 minutes microwave decomposition. Particle size:  $4 \pm 1$  nm (97 particles counted). EDX-Quantification from different spots on the TEM-Grid showed No SAED-measurement possible.

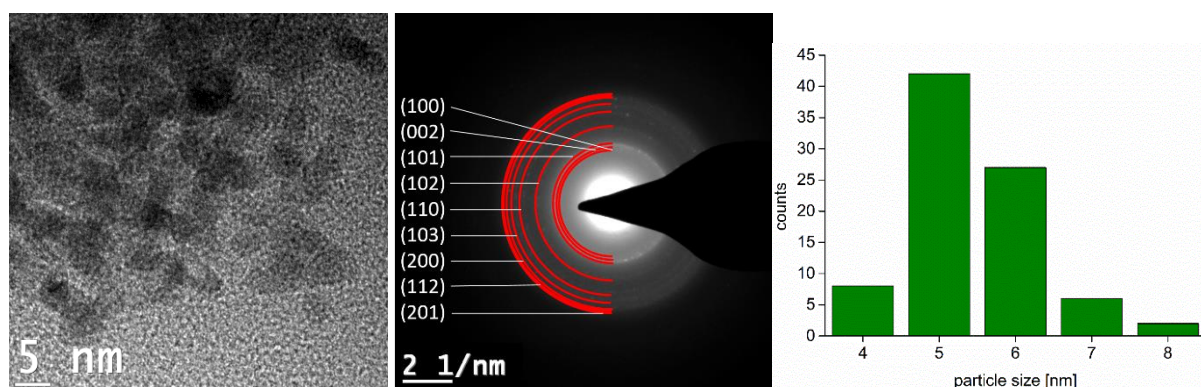

**Figure S9:** TEM-image and particle size distribution of 1.0 wt % Ni-nanoparticles in  $[\text{EMIm}][\text{FB(CN)}_3]$  from  $\text{Ni(COD)}_2$  and  $\text{GaCp}^*$ . 1 hour dispersion time, 30 minutes microwave decomposition. SAED with indexed reflections for Ni (space group:  $P6_3/mmc$ ), particle size:  $5 \pm 1$  nm (85 particles counted). EDX-Quantification from this spot showed ratio of nickel to gallium of 87:13 atom % ( $\pm 1$  atom %).

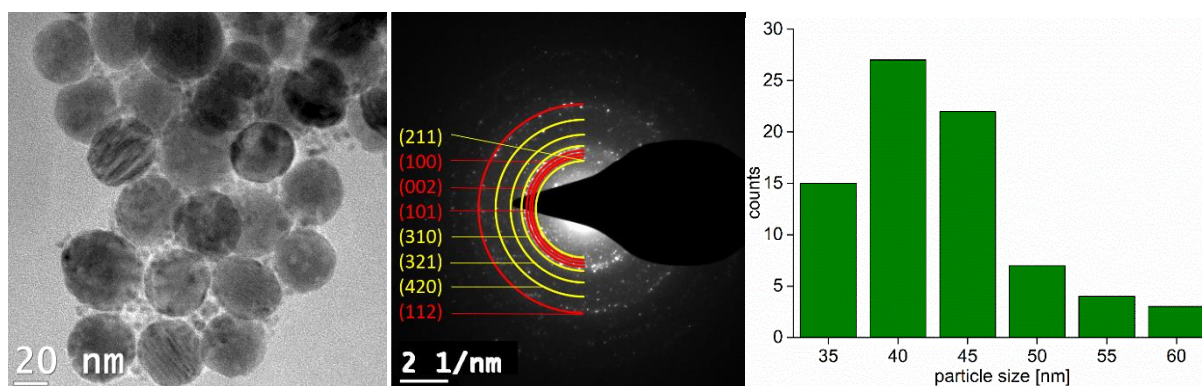

**Figure S10:** TEM-image and particles size distribution of 1.0 wt % Ni- and Ga(Ni)-nanoparticles in [EMIm][FB(CN)<sub>3</sub>] from Ni(COD)<sub>2</sub> and GaCp\*. 1 hour dispersion time, 30 minutes microwave decomposition. SAED with indexed reflections for Ni (red diffraction rings for space group:  $P6_3/mmc$ ) and Ga (yellow diffraction rings for space group:  $\bar{1}43d$ ), particle size: Ni:  $5 \pm 1$  nm, Ga(Ni):  $40 \pm 5$  nm. EDX-Quantification from this spot showed ratio of nickel to gallium of 49:51 atom % ( $\pm 1$  atom %).

**24 h dispersion of the precursors in the IL before MWI**

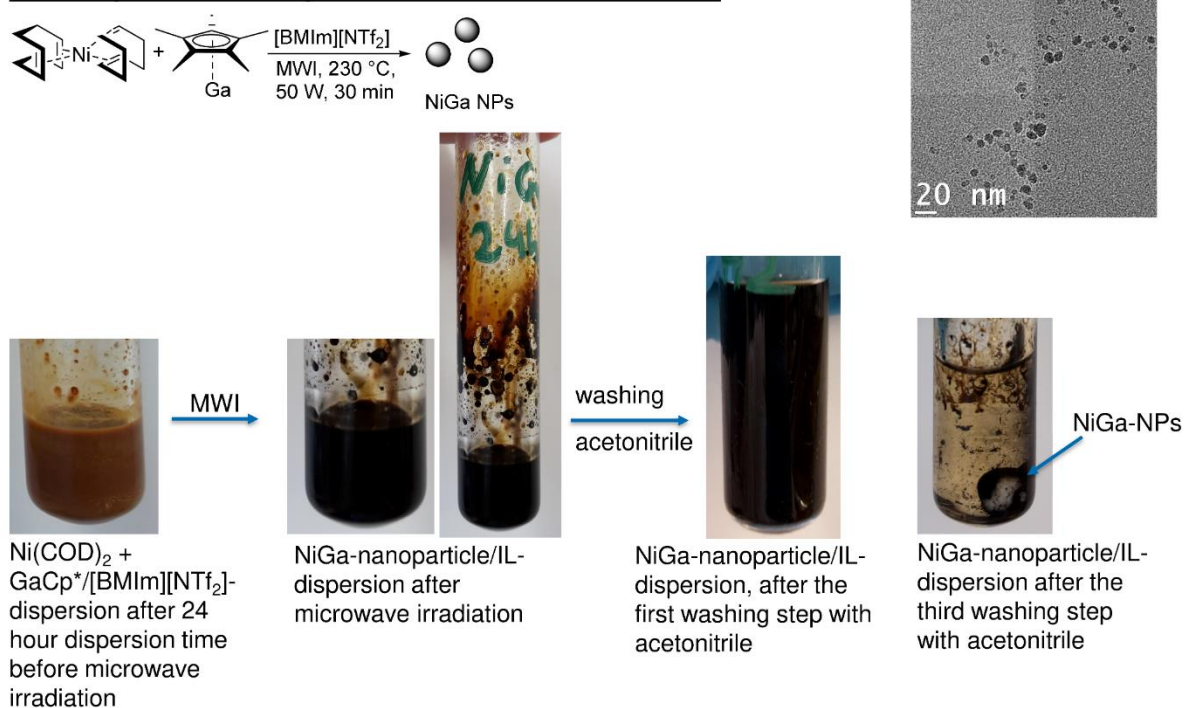

**Figure S11:** preparation of NiGa-nanoparticles from 24 hour dispersion time and 30 minutes decomposition time.

**Table S3:** Semihydrogenation of 4-octyne to 4-octene using IL-free, precipitated NiGa-nanoparticles in comparison to NiGa@[BMIm][NTf<sub>2</sub>].<sup>a</sup>

|       | NiGa-nanoparticles |             |     |                    | NiGa@[BMIm][NTf <sub>2</sub> ] |             |     |                    |
|-------|--------------------|-------------|-----|--------------------|--------------------------------|-------------|-----|--------------------|
|       | conversion         | selectivity | TON | TOF                | conversion                     | selectivity | TON | TOF                |
|       | 4-octene           |             |     |                    | 4-octene                       |             |     |                    |
|       | [%]                | [%]         | –   | [h <sup>-1</sup> ] | [%]                            | [%]         | –   | [h <sup>-1</sup> ] |
| run 1 | 93–96              | 82–89       | 157 | 170                | 15-19                          | 100         | 384 | 128                |
| run 2 | 92–93              | 95–100      | 175 | 211                | 10                             | 100         | 322 | 107                |
| run 3 | 82–92              | 96–100      | 143 | 154                | 20                             | 100         | 558 | 186                |

<sup>a</sup> 0.1 g NiGa@[BMIm][NTf<sub>2</sub>] dispersion (1 wt % = 0.001 g in total metal, 7.8 μmol NiGa) and 2 g (2.7 mL, 18.2 mmol) of degassed dry 4-octyne (molar NiGa:substrate ratio = 1:2331) were stirred under 5 bar H<sub>2</sub> at 120 °C for 3 h. Runs 1–3 were carried out with the same catalyst by removing the products in high vacuum. In a typical catalytic test reaction 10 mg precipitated, IL-free NiGa-nanoparticles (77 μmol) and 1 g (1.35 mL, 9 mmol) of degassed dry 4-octyne (molar NiGa:substrate ratio = 1:115) were stirred under 5 bar H<sub>2</sub> at 120 °C. Runs 1–3 were carried out with the same catalyst by removing the products in high vacuum. TON per run (TON = mol<sub>substrate</sub>/mol<sub>catalyst</sub>). TOF [h<sup>-1</sup>] per run (TOF = mol<sub>substrate</sub>/(mol<sub>catalyst</sub>\*time)).

**Table S4:** Mass of Ni(COD)<sub>2</sub>, GaCp\* IL and PC, wt % total metal dispersion, dispersion and decomposition times in IL or PC.

| IL/PC                        | IL/PC<br>g<br>(mL) | Ni(COD) <sub>2</sub><br>mg<br>(mmol) | GaCp*<br>mg<br>(mmol) | wt % total<br>metal<br>dispersion | dispersion<br>time<br>[h] | decomp.<br>time<br>[min] |
|------------------------------|--------------------|--------------------------------------|-----------------------|-----------------------------------|---------------------------|--------------------------|
| [BMIm][BF <sub>4</sub> ]     | 1.9341<br>(1.51)   | 43.1<br>(0.157)                      | 31.8<br>(0.154)       | 0.995                             | 24                        | 10                       |
| [BMIm][BF <sub>4</sub> ]     | 1.2012<br>(0.94)   | 13.1<br>(0.048)                      | 9.8<br>(0.048)        | 0.499                             | 24                        | 20                       |
| [BMIm][NTf <sub>2</sub> ]    | 1.2064<br>(0.84)   | 13.1<br>(0.048)                      | 10<br>(0.049)         | 0.502                             | 24                        | 10                       |
| [BMIm][NTf <sub>2</sub> ]    | 0.9998<br>(0.70)   | 12.6<br>(0.046)                      | 8.2<br>(0.040)        | 0.544                             | 24                        | 30                       |
| [BMIm][NTf <sub>2</sub> ]    | 1.0057<br>(0.70)   | 11.7<br>(0.043)                      | 10.3<br>(0.050)       | 0.572                             | 1                         | 30                       |
| [BMIm][NTf <sub>2</sub> ]    | 1.0023<br>(0.70)   | 22.3<br>(0.081)                      | 19.4<br>(0.094)       | 1.066                             | 12                        | 30                       |
| PC                           | 1.2001<br>(1.00)   | 13.1<br>(0.048)                      | 10.0<br>(0.0049)      | 0.504                             | 24                        | 20                       |
| [EMIm][B(CN) <sub>4</sub> ]  | 1.0015<br>(0.96)   | 22.4<br>(0.081)                      | 18.4<br>(0.089)       | 1.0045                            | 0.5                       | 30                       |
| [EMIm][B(CN) <sub>4</sub> ]  | 0.2533<br>(0.24)   | 8.8<br>(0.032)                       | 6.2<br>(0.030)        | 1.493                             | 24                        | 20                       |
| [EMIm][BF(CN) <sub>3</sub> ] | 1.0045<br>(0.94)   | 22.5<br>(0.082)                      | 17.6<br>(0.085)       | 1.025                             | 1                         | 30                       |
| [EMIm][BF(CN) <sub>3</sub> ] | 0.3156<br>(0.19)   | 10.6<br>(0.039)                      | 7.9<br>(0.038)        | 1.478                             | 24                        | 30                       |
| [BMIm][NTf <sub>2</sub> ]    | 1.0586<br>(0.74)   | –                                    | 15.6<br>(0.076)       | 0.492                             | 24                        | 60                       |

<sup>1</sup> H. Okamoto, *J. Phase Equilib. Diffus.* **2010**, 31, 575–576.
